# Supplementary material for: Legacy and emerging airborne per- and polyfluoroalkyl substances (PFAS) collected on PM2.5 filters in close proximity to a fluoropolymer manufacturing facility
Source: Royal Society of Chemistry journal article supplement (doi:10.1039/d2em00358a), 2022-01-01
Supplement: d2em00358a1.pdf [file d2em00358a1.pdf]

1 **Supporting Information of:**

2 Legacy and Emerging Airborne Per- and  
3 Polyfluoroalkyl Substances (PFAS) Collected on  
4 PM<sub>2.5</sub> Filters in Close Proximity to a Fluoropolymer  
5 Manufacturing Facility

6 *Jiaqi Zhou<sup>1</sup>, Karsten Baumann<sup>1,2</sup>, Jason D. Surratt<sup>1,3\*</sup>, Barbara J. Turpin<sup>1\*</sup>*

7 1. Department of Environmental Sciences and Engineering, Gillings School of Global Public  
8 Health, University of North Carolina at Chapel Hill, Chapel Hill, NC, United States

9 2. Picarro Inc., Santa Clara, CA, United States

10 3. Department of Chemistry, College of Arts and Sciences, University of North Carolina at Chapel  
11 Hill, Chapel Hill, NC, United States

12

13 \*Corresponding Authors:

14 Jason D. Surratt- Department of Environmental Sciences and Engineering, Gillings School of  
15 Global Public Health, University of North Carolina at Chapel Hill, Chapel Hill, North Carolina,  
16 27514; Email: [surratt@unc.edu](mailto:surratt@unc.edu)

17 Barbara J. Turpin- Department of Environmental Sciences and Engineering, Gillings School of  
18 Global Public Health, University of North Carolina at Chapel Hill, Chapel Hill, North Carolina,  
19 27514; Email: [bjturpin@email.unc.edu](mailto:bjturpin@email.unc.edu)

20

21 No. of Pages: 20

22 No. of Figures: 3

23 No. of Tables: 7

24 **Table S1.** List of targeted per- and polyfluoroalkyl substances.

| Compound                                                                                                                                  | Molecular weight | Formula                                                        | CAS#         | Mass-labeled standard                 |
|-------------------------------------------------------------------------------------------------------------------------------------------|------------------|----------------------------------------------------------------|--------------|---------------------------------------|
| <b>Perfluorocarboxylic acids (PFCAs)</b>                                                                                                  |                  |                                                                |              |                                       |
| Perfluoro-n-butanoic acid (PFBA)                                                                                                          | 214.0            | C <sub>4</sub> HF <sub>7</sub> O <sub>2</sub>                  | 375-22-4     | <sup>13</sup> C <sub>4</sub> -PFBA    |
| Perfluoro-n-pentanoic acid (PFPeA)                                                                                                        | 264.0            | C <sub>5</sub> HF <sub>9</sub> O <sub>2</sub>                  | 2706-90-3    | <sup>13</sup> C <sub>5</sub> -PFPeA   |
| Perfluoro-n-hexanoic acid (PFHxA)                                                                                                         | 314.1            | C <sub>6</sub> HF <sub>11</sub> O <sub>2</sub>                 | 307-24-4     | <sup>13</sup> C <sub>3</sub> -PFHxA   |
| Perfluoro-n-heptanoic acid (PFHpA)                                                                                                        | 364.1            | C <sub>7</sub> HF <sub>13</sub> O <sub>2</sub>                 | 375-85-9     | <sup>13</sup> C <sub>4</sub> -PFHpA   |
| Perfluoro-n-octanoic acid (PFOA)                                                                                                          | 414.1            | C <sub>8</sub> HF <sub>15</sub> O <sub>2</sub>                 | 335-67-1     | <sup>13</sup> C <sub>8</sub> -PFOA    |
| Perfluoro-n-nonanoic acid (PFNA)                                                                                                          | 464.1            | C <sub>9</sub> HF <sub>17</sub> O <sub>2</sub>                 | 375-95-1     | <sup>13</sup> C <sub>9</sub> -PFNA    |
| Perfluoro-n-decanoic acid (PFDA)                                                                                                          | 514.1            | C <sub>10</sub> HF <sub>19</sub> O <sub>2</sub>                | 335-76-2     | <sup>13</sup> C <sub>6</sub> -PFDA    |
| Perfluoro-n-undecanoic acid (PFUdA)                                                                                                       | 564.1            | C <sub>11</sub> HF <sub>21</sub> O <sub>2</sub>                | 2058-94-8    | <sup>13</sup> C <sub>7</sub> -PFUdA   |
| Perfluoro-n-dodecanoic acid (PFDoA)                                                                                                       | 614.1            | C <sub>12</sub> HF <sub>23</sub> O <sub>2</sub>                | 307-55-1     | <sup>13</sup> C <sub>2</sub> -PFDoA   |
| Perfluoro-n-tridecanoic acid (PFTTrDA)                                                                                                    | 664.0            | C <sub>13</sub> HF <sub>25</sub> O <sub>2</sub>                | 72629-94-8   | <sup>13</sup> C <sub>2</sub> -PFDoA   |
| Perfluoro-n-tetradecanoic acid (PFTeDA)                                                                                                   | 714.0            | C <sub>14</sub> HF <sub>27</sub> O <sub>2</sub>                | 376-06-7     | <sup>13</sup> C <sub>2</sub> -PFTeDA  |
| Perfluoro-n-hexadecanoic acid (PFHxDA)                                                                                                    | 814.1            | C <sub>16</sub> HF <sub>31</sub> O <sub>2</sub>                | 67905-19-5   | <sup>13</sup> C <sub>2</sub> -PFTeDA  |
| Perfluoro-n-octadecanoic acid (PFODA)                                                                                                     | 914.1            | C <sub>18</sub> HF <sub>35</sub> O <sub>2</sub>                | 16517-11-6   | <sup>13</sup> C <sub>2</sub> -PFTeDA  |
| <b>Perfluorosulfonic acids (PFsAs)</b>                                                                                                    |                  |                                                                |              |                                       |
| Perfluorobutane sulfonic acid (PFBS)                                                                                                      | 300.1            | C <sub>4</sub> HF <sub>9</sub> O <sub>3</sub> S                | 375-73-5     | <sup>13</sup> C <sub>3</sub> -PFBS    |
| Perfluoropentane sulfonic acid (PFPeS)                                                                                                    | 350.1            | C <sub>5</sub> HF <sub>11</sub> O <sub>3</sub> S               | 2706-91-4    | <sup>13</sup> C <sub>3</sub> -PFBS    |
| Perfluorohexane sulfonic acid (PFHxS)                                                                                                     | 400.1            | C <sub>6</sub> HF <sub>13</sub> O <sub>3</sub> S               | 355-46-4     | <sup>13</sup> C <sub>3</sub> -PFHxS   |
| Perfluoroheptane sulfonic acid (PFHpS)                                                                                                    | 488.2            | C <sub>7</sub> HF <sub>15</sub> O <sub>3</sub> S               | 375-92-8     | <sup>13</sup> C <sub>3</sub> -PFHxS   |
| Perfluorooctane sulfonic acid (PFOS)                                                                                                      | 500.1            | C <sub>8</sub> HF <sub>17</sub> O <sub>3</sub> S               | 1763-23-1    | <sup>13</sup> C <sub>8</sub> -PFOS    |
| Perfluorononane sulfonic acid (PFNS)                                                                                                      | 567.2            | C <sub>9</sub> HF <sub>19</sub> O <sub>3</sub> S               | 68259-12-1   | <sup>13</sup> C <sub>8</sub> -PFOS    |
| Perfluorodecane sulfonic acid (PFDS)                                                                                                      | 617.2            | C <sub>10</sub> HF <sub>21</sub> O <sub>3</sub> S              | 335-77-3     | <sup>13</sup> C <sub>8</sub> -PFOS    |
| Perfluorododecane sulfonic acid (PFDoS)                                                                                                   | 700.1            | C <sub>12</sub> HF <sub>25</sub> O <sub>3</sub> S              | 79780-39-5   | <sup>13</sup> C <sub>8</sub> -PFOS    |
| <b>Perfluoroalkyl ether carboxylic and sulfonic acids (PFECAs and PFESAs)</b>                                                             |                  |                                                                |              |                                       |
| Perfluoro-2-methoxyacetic acid (PFMOAA)                                                                                                   | 180.0            | C <sub>3</sub> HF <sub>5</sub> O <sub>3</sub>                  | 674-13-5     | <sup>13</sup> C <sub>4</sub> -PFBA    |
| Perfluoro-2-methoxypropanoic acid (PMPA)                                                                                                  | 230.0            | C <sub>4</sub> HF <sub>7</sub> O <sub>3</sub>                  | 13140-29-9   | <sup>13</sup> C <sub>4</sub> -PFBA    |
| Perfluoro (3,5-dioxahexanoic) acid (PFO2HxA)                                                                                              | 246.0            | C <sub>4</sub> HF <sub>7</sub> O <sub>4</sub>                  | 39492-88-1   | <sup>13</sup> C <sub>3</sub> -HFPO-DA |
| 1,1,2,2-tetrafluoro-2-((1,2,2,2-tetrafluoro-ethoxy)ethane sulfonate (NVHOS)                                                               | 297.9            | C <sub>4</sub> H <sub>2</sub> F <sub>8</sub> O <sub>4</sub> S  | 801209-99-4  | <sup>13</sup> C <sub>3</sub> -PFBS    |
| Perfluoro-2-ethoxypropanoic acid (PEPA)                                                                                                   | 280.0            | C <sub>5</sub> HF <sub>9</sub> O <sub>3</sub>                  | 267239-61-2  | <sup>13</sup> C <sub>3</sub> -HFPO-DA |
| Perfluoro (3,5,7-trioxaoctanoic) acid (PFO3OA)                                                                                            | 312.0            | C <sub>5</sub> HF <sub>9</sub> O <sub>5</sub>                  | 39492-89-2   | <sup>13</sup> C <sub>3</sub> -HFPO-DA |
| Hexafluoropropylene oxide-dimer acid (HFPO-DA), parent acid of "GenX" (GenX)                                                              | 330.1            | C <sub>6</sub> HF <sub>11</sub> O <sub>3</sub>                 | 13252-13-6   | <sup>13</sup> C <sub>3</sub> -HFPO-DA |
| Perfluoro (3,5,7,9-tetraoxadecanoic) acid (PFO4DA)                                                                                        | 378.0            | C <sub>6</sub> HF <sub>11</sub> O <sub>6</sub>                 | 39492-90-5   | <sup>13</sup> C <sub>3</sub> -HFPO-DA |
| Perfluoro 3,5,7,9,11-pentaaxadecanoic acid (PFO5DoA)                                                                                      | 443.9            | C <sub>7</sub> HF <sub>13</sub> O <sub>7</sub>                 | 39492-91-6   | <sup>13</sup> C <sub>9</sub> -PFNA    |
| 2,2,3,3-tetrafluoro-3-((1,1,1,2,3,3-hexafluoro-3-(1,2,2,2-tetrafluoroethoxy)propan-2-yl)oxy)propanoic acid (HydroEve)                     | 427.9            | C <sub>8</sub> H <sub>2</sub> F <sub>14</sub> O <sub>4</sub>   | 773804-62-9  | <sup>13</sup> C <sub>3</sub> -HFPO-DA |
| 2-[1-[Difluoro[(1,2,2-trifluoroethenyl)oxy]methyl]-1,2,2,2-tetrafluoroethoxy]-1,1,2,2-tetrafluoroethanesulfonic acid (Nafion Byproduct 1) | 443.9            | C <sub>7</sub> HF <sub>13</sub> O <sub>5</sub> S               | 29311-67-9   | <sup>13</sup> C <sub>3</sub> -PFHxS   |
| 1,1,2,2-tetrafluoro-2-[1,1,1,2,3,3-hexafluoro-3-(1,2,2,2-tetrafluoroethoxy)propan-2-yl]oxyethanesulfonic acid (Nafion Byproduct 2)        | 463.9            | C <sub>7</sub> H <sub>2</sub> F <sub>14</sub> O <sub>5</sub> S | 749836-20-2  | <sup>13</sup> C <sub>3</sub> -PFHxS   |
| 2,2,3,3,4,5,5,5-(1,1,2,2-tetrafluoro-2-sulfoethoxy)pentanoate (Nafion Byproduct 4)                                                        | 440.9            | C <sub>7</sub> H <sub>2</sub> F <sub>12</sub> O <sub>6</sub> S | 2416366-18-0 | <sup>13</sup> C <sub>4</sub> -PFBA    |

26 **Table S2.** Analytical detection limits for each targeted PFAS.

| Analyte                                                                       | Extract conc. (ng/mL) | Estimated air conc. (pg/m <sup>3</sup> ) |
|-------------------------------------------------------------------------------|-----------------------|------------------------------------------|
| <b>Perfluorocarboxylic acids (PFCAs)</b>                                      |                       |                                          |
| PFBA                                                                          | 0.13                  | 0.0068                                   |
| PFPeA                                                                         | 0.08                  | 0.0042                                   |
| PFHxA                                                                         | 0.05                  | 0.0026                                   |
| PFHpA                                                                         | 0.07                  | 0.0037                                   |
| PFOA                                                                          | 0.07                  | 0.0037                                   |
| PFNA                                                                          | 0.05                  | 0.0026                                   |
| PFDA                                                                          | 0.05                  | 0.0026                                   |
| PFUdA                                                                         | 0.08                  | 0.0042                                   |
| PFDoA                                                                         | 0.06                  | 0.0032                                   |
| PFTTrDA                                                                       | 0.10                  | 0.0053                                   |
| PFTeDA                                                                        | 0.02                  | 0.0011                                   |
| PFHxDA                                                                        | 0.23                  | 0.012                                    |
| PFODA                                                                         | 0.20                  | 0.011                                    |
| <b>Perfluorosulfonic acids (PFSA)</b>                                         |                       |                                          |
| PFBS                                                                          | 0.25                  | 0.013                                    |
| PFPeS                                                                         | 0.20                  | 0.011                                    |
| PFHxS                                                                         | 0.26                  | 0.014                                    |
| PFHpS                                                                         | 0.10                  | 0.0053                                   |
| PFOS                                                                          | 0.05                  | 0.0026                                   |
| PFNS                                                                          | 0.12                  | 0.0063                                   |
| PFDS                                                                          | 0.09                  | 0.0047                                   |
| PFDoS                                                                         | 0.54                  | 0.028                                    |
| <b>Perfluoroalkyl ether carboxylic and sulfonic acids (PFECAs and PFESAs)</b> |                       |                                          |
| GenX                                                                          | 0.32                  | 0.017                                    |
| NVHOS                                                                         | 0.21                  | 0.011                                    |
| HydroEve                                                                      | 0.05                  | 0.0026                                   |
| PFMOAA                                                                        | 0.18                  | 0.0095                                   |
| PEPA                                                                          | 0.30                  | 0.016                                    |
| PMPA                                                                          | 0.04                  | 0.0021                                   |
| PFO2HxA                                                                       | 0.23                  | 0.012                                    |
| PFO3OA                                                                        | 0.17                  | 0.0089                                   |
| PFO4DA                                                                        | 0.13                  | 0.0068                                   |
| PFO5DoA                                                                       | 0.09                  | 0.0047                                   |
| Nafion Byproduct 1                                                            | 0.05                  | 0.0026                                   |
| Nafion Byproduct 2                                                            | 0.05                  | 0.0026                                   |
| Nafion Byproduct 4                                                            | 0.06                  | 0.0032                                   |

27 Note: The detection limits, expressed as air concentrations, were estimated using the analytical method detection limit, multiplying by a final  
 28 extract volume of 100 µl, and dividing by a sample air volume of 1901 m<sup>3</sup> (sampling flow rate of 220 L min<sup>-1</sup>, sampling duration of 6 days).

29 **Table S3.** Weekly-averaged PFAS concentrations in PM<sub>2.5</sub> (pg/m<sup>3</sup>)<sup>a</sup>. Values in bold are detectable (i.e., greater than the field  
 30 measurement detection limit). Values after “<” are the analytical detection limit based on injection of standards.  
 31

| Legacy PFAS Weekly-Averaged PM <sub>2.5</sub> Concentrations (pg/m <sup>3</sup> ) |                   |                              |             |             |         |         |             |             |         |             |        |             |             |             |
|-----------------------------------------------------------------------------------|-------------------|------------------------------|-------------|-------------|---------|---------|-------------|-------------|---------|-------------|--------|-------------|-------------|-------------|
| Sample ID                                                                         | Sampling Duration | Air Volume (m <sup>3</sup> ) | PFBA        | PFHxA       | PFHpA   | PFOA    | PFNA        | PFDoA       | PFTeDA  | PFHxDA      | PFODA  | PFHxS       | PFOS        | PFDoS       |
| SP1_1                                                                             | 091319-091919     | 1614                         | 0.23        | <b>1.08</b> | <0.0087 | <0.0087 | <0.0062     | <0.0074     | <0.0025 | <0.029      | <0.025 | <0.032      | <b>1.86</b> | <0.067      |
| HV1_1                                                                             | 092019-092619     | 2180                         | 0.20        | <b>2.53</b> | <0.0064 | 0.035   | <0.0046     | <0.0055     | <0.0018 | <0.021      | <0.018 | <0.024      | <b>0.63</b> | <0.050      |
| SW1                                                                               | 092719-100319     | 1955                         | 0.16        | <b>6.10</b> | <0.0072 | <0.0072 | <0.0051     | <0.0061     | <0.0020 | <0.024      | <0.021 | <0.027      | <0.0051     | <0.055      |
| SW2                                                                               | 100419-101019     | 1922                         | <b>0.42</b> | <b>3.18</b> | <0.0073 | <0.0073 | <0.0052     | 0.040       | <0.0021 | <b>1.90</b> | <0.021 | <0.027      | <b>0.23</b> | <0.056      |
| SW3                                                                               | 101119-101719     | 1922                         | <b>0.32</b> | <b>2.54</b> | <0.0073 | <0.0073 | <0.0052     | <0.0062     | <0.0021 | <b>1.21</b> | <0.021 | <0.027      | <b>0.88</b> | <0.056      |
| SW4                                                                               | 101819-102419     | 1901                         | <b>0.33</b> | <b>0.39</b> | <0.0074 | <0.0074 | <0.0053     | <0.0063     | <0.0021 | <0.024      | <0.021 | <0.027      | <b>0.85</b> | <0.057      |
| SW5                                                                               | 102519-103119     | 1923                         | <b>0.30</b> | <b>0.55</b> | <0.0073 | <0.0073 | <0.0052     | <0.0062     | <0.0021 | <0.024      | <0.021 | <0.027      | <b>0.28</b> | <0.056      |
| SW6                                                                               | 110119-110719     | 1861                         | <b>0.39</b> | <b>1.89</b> | <0.0075 | <0.0075 | <0.0054     | <0.0064     | <0.0021 | <0.025      | <0.022 | <0.028      | <b>1.16</b> | <0.058      |
| SW7                                                                               | 110819-111419     | 1820                         | <b>0.45</b> | <b>0.52</b> | <0.0077 | <0.0077 | <0.0055     | <0.0066     | <0.0022 | <0.025      | <0.022 | <0.029      | <b>0.86</b> | <0.059      |
| SW8                                                                               | 111519-112119     | 1850                         | <b>0.75</b> | <b>0.42</b> | <0.0076 | <0.0076 | <0.0054     | <0.0065     | <0.0022 | <0.025      | <0.022 | <0.028      | <b>0.36</b> | <0.058      |
| SW9                                                                               | 112219-112819     | 1872                         | 0.28        | <b>1.73</b> | <0.0075 | <0.0075 | <0.0053     | <0.0064     | <0.0021 | <0.025      | <0.021 | <0.028      | <b>1.59</b> | <0.058      |
| SW10                                                                              | 112919-120519     | 1864                         | <b>0.56</b> | <b>0.14</b> | <0.0075 | <0.0075 | <0.0054     | <0.0064     | <0.0021 | <0.025      | <0.022 | <0.028      | <b>2.71</b> | <0.058      |
| SW11                                                                              | 120619-121219     | 1838                         | <b>0.65</b> | <0.0054     | <0.0076 | <0.0076 | <0.0054     | <0.0065     | <0.0022 | <0.025      | <0.022 | <0.028      | <b>1.44</b> | <0.059      |
| SW12                                                                              | 121319-121919     | 1856                         | <b>0.73</b> | <0.0054     | <0.0075 | <0.0075 | <0.0054     | <0.0065     | <0.0022 | <0.025      | <0.022 | <0.028      | <b>1.29</b> | <0.058      |
| SW13                                                                              | 122019-122619     | 1828                         | <b>0.62</b> | <b>0.29</b> | <0.0077 | <0.0077 | <0.0055     | <0.0066     | <0.0022 | <0.025      | <0.022 | <0.028      | <b>1.01</b> | <0.059      |
| SW14                                                                              | 122719-010220     | 1818                         | <b>0.69</b> | <b>0.30</b> | <0.0077 | <0.0077 | <0.0055     | 0.031       | <0.0022 | <b>1.71</b> | <0.022 | <0.029      | <b>1.59</b> | <0.059      |
| SW15                                                                              | 010320-010920     | 1725                         | <b>0.67</b> | <0.0058     | <0.0081 | <0.0081 | <0.0058     | <0.0070     | <0.0023 | <0.027      | <0.023 | <0.030      | <b>3.19</b> | <0.063      |
| SW16                                                                              | 011020-011620     | 1799                         | <b>0.92</b> | <b>1.41</b> | <0.0078 | 0.024   | <0.0056     | 0.045       | <0.0022 | <b>1.07</b> | <0.022 | <b>0.73</b> | <b>0.54</b> | <b>1.42</b> |
| SW17                                                                              | 011720-012320     | 1818                         | <b>0.70</b> | <b>0.24</b> | <0.0077 | <0.0077 | <0.0055     | <0.0066     | <0.0022 | <0.025      | <0.022 | <0.029      | <b>0.33</b> | <0.059      |
| SW18                                                                              | 012420-013020     | 1810                         | <b>0.96</b> | <b>0.21</b> | <0.0077 | 0.022   | <0.0055     | <0.0066     | <0.0022 | <0.025      | <0.022 | <0.029      | <b>0.68</b> | <0.060      |
| SW21                                                                              | 021420-022020     | 1708                         | <b>0.75</b> | <b>3.21</b> | <0.0082 | <0.0082 | <0.0059     | 0.027       | <0.0023 | <0.027      | <0.023 | <0.031      | <b>0.31</b> | <b>0.32</b> |
| SW22                                                                              | 022120-022720     | 1729                         | <b>0.62</b> | <b>1.12</b> | <0.0081 | <0.0081 | <0.0058     | <0.0069     | <0.0023 | <b>1.41</b> | <0.023 | <0.030      | <b>1.10</b> | <0.063      |
| SW23                                                                              | 022820-030520     | 1628                         | <b>0.68</b> | <b>3.52</b> | <0.0086 | <0.0086 | <0.0061     | <0.0074     | <0.0025 | <b>1.02</b> | <0.025 | <0.032      | <b>1.51</b> | <0.066      |
| SW24                                                                              | 030620-031220     | 1653                         | <b>0.54</b> | <b>1.15</b> | <0.0085 | <0.0085 | <0.0060     | <0.0073     | <0.0024 | <0.028      | <0.024 | <0.032      | <b>0.93</b> | <0.065      |
| SW25                                                                              | 031320-031920     | 1672                         | <b>0.53</b> | <b>3.49</b> | <0.0084 | <0.0084 | <0.0060     | <b>0.29</b> | <0.0024 | <0.028      | <0.024 | <0.031      | <b>1.69</b> | <0.065      |
| SW26                                                                              | 032020-032620     | 1672                         | <b>0.49</b> | <b>1.72</b> | <0.0084 | <0.0084 | <0.0060     | <0.0072     | <0.0024 | <0.028      | <0.024 | <0.031      | <b>0.49</b> | <0.065      |
| NE1                                                                               | 092719-100319     | 1902                         | 0.08        | <b>4.96</b> | <0.0074 | 0.042   | <0.0053     | <0.0063     | <0.0021 | <0.024      | <0.021 | <0.027      | <0.0053     | <0.057      |
| NE2                                                                               | 100419-101019     | 1914                         | 0.27        | <b>0.73</b> | <0.0073 | 0.18    | <0.0052     | <0.0063     | <0.0021 | <0.024      | <0.021 | <0.027      | <b>1.02</b> | <0.056      |
| NE3                                                                               | 101119-101719     | 2089                         | 0.19        | <b>0.99</b> | <0.0067 | <0.0067 | <0.0048     | <0.0057     | <0.0019 | <0.022      | <0.019 | <0.025      | <b>2.05</b> | <0.052      |
| NE4                                                                               | 101819-102419     | 2073                         | 0.28        | <b>0.86</b> | <0.0068 | 0.012   | <0.0048     | <0.0058     | <0.0019 | <0.022      | <0.019 | <0.025      | <b>1.04</b> | <0.052      |
| NE5                                                                               | 102519-103119     | 2114                         | 0.25        | <b>1.02</b> | <0.0066 | <0.0066 | <b>0.24</b> | <0.0057     | <0.0019 | <0.022      | <0.019 | <0.025      | <b>0.70</b> | <0.051      |
| NE6                                                                               | 110119-110719     | 1983                         | <b>0.37</b> | <0.0050     | <0.0071 | <0.0071 | <0.0050     | <0.0061     | <0.0020 | <0.023      | <0.020 | <0.026      | <b>1.03</b> | <0.055      |

| NE7                                                                                     | 110819-111419     | 1949                         | <b>0.62</b> | <0.0051 | <0.0072     | 0.059        | <0.0051      | <0.0062     | <0.0021     | <0.024      | <0.021       | <0.027       | <b>1.71</b>   | <0.055       |
|-----------------------------------------------------------------------------------------|-------------------|------------------------------|-------------|---------|-------------|--------------|--------------|-------------|-------------|-------------|--------------|--------------|---------------|--------------|
| NE8                                                                                     | 111519-112119     | 2137                         | <b>0.59</b> | <0.0047 | <0.0066     | <0.0066      | <0.0047      | <0.0056     | <0.0019     | <0.022      | <0.019       | <0.024       | <b>0.55</b>   | <0.051       |
| NE9                                                                                     | 112219-112819     | 2050                         | <b>0.48</b> | <0.0049 | <0.0068     | <0.0068      | <0.0049      | <0.0059     | <0.0020     | <0.022      | <0.020       | <b>0.16</b>  | <b>2.40</b>   | <0.053       |
| NE10                                                                                    | 112919-120519     | 1863                         | <b>0.44</b> | <0.0054 | <b>0.71</b> | <0.0075      | <0.0054      | 0.0026      | <0.0021     | <b>5.33</b> | <b>2.75</b>  | <0.028       | <b>1.34</b>   | <0.058       |
| NE11                                                                                    | 120619-121219     | 1839                         | <b>0.67</b> | <0.0054 | <0.0076     | 0.011        | <0.0054      | <0.0065     | <0.0022     | <0.025      | <0.022       | <0.028       | <b>0.86</b>   | <0.059       |
| NE12                                                                                    | 121319-121919     | 1841                         | <b>0.56</b> | <0.0054 | <0.0076     | <0.0076      | <0.0054      | <0.0065     | <0.0022     | <0.025      | <0.022       | <0.028       | <b>3.33</b>   | <0.059       |
| NE13                                                                                    | 122019-122619     | 1828                         | <b>0.52</b> | <0.0055 | <0.0077     | <0.0077      | <0.0055      | 0.047       | 0.0080      | <b>0.92</b> | <b>1.32</b>  | <0.028       | <b>1.29</b>   | <0.059       |
| NE15                                                                                    | 010320-010920     | 1788                         | <b>0.59</b> | <0.0056 | <0.0078     | <0.0078      | <0.0056      | <0.0067     | <0.0022     | <0.026      | <0.022       | <0.029       | <b>2.05</b>   | <0.060       |
| NE18                                                                                    | 021420-022020     | 1858                         | <b>0.59</b> | <0.0054 | <0.0075     | <0.0075      | <0.0054      | <0.0065     | <0.0022     | <0.025      | <0.022       | <0.028       | <b>2.30</b>   | <0.058       |
| NE19                                                                                    | 022120-022720     | 1720                         | <b>0.67</b> | <0.0058 | <0.0081     | <0.0081      | <0.0058      | <0.0070     | <0.0023     | <0.027      | <b>2.55</b>  | <b>0.22</b>  | <b>1.75</b>   | <b>3.65</b>  |
| NE20                                                                                    | 022820-030520     | 1652                         | <b>0.75</b> | <0.0061 | <0.0085     | 0.0638       | <0.0061      | <0.0073     | <0.0024     | <0.028      | <0.024       | <b>0.12</b>  | <b>3.36</b>   | <0.065       |
| NE21                                                                                    | 030620-031220     | 1644                         | <b>0.61</b> | <0.0061 | <0.0085     | <0.0085      | <0.0061      | <0.0073     | <0.0024     | <0.028      | <0.024       | <0.032       | <b>2.18</b>   | <0.066       |
| NE22                                                                                    | 031320-031920     | 1662                         | <b>0.65</b> | <0.0060 | <0.0084     | <0.0084      | <0.0060      | <0.0072     | <0.0024     | <0.028      | <0.024       | <0.031       | <b>4.70</b>   | <0.065       |
| NE23                                                                                    | 032020-032620     | 1613                         | <b>0.60</b> | <0.0062 | <0.0087     | <0.0087      | <0.0062      | <0.0074     | <0.0025     | <0.029      | <0.025       | <0.032       | <b>0.75</b>   | <0.067       |
| Field Measurement Detection Limit (pg/m <sup>3</sup> ) <sup>b</sup>                     |                   | 0.29                         | 0.026       | 0.025   | 0.63        | 0.042        | 0.058        | 0.034       | 0.073       | 0.59        | 0.014        | 0.0026       | 0.028         |              |
| Average Field Blank (pg/m <sup>3</sup> )                                                |                   | 0.18                         | 0.0099      | 0.0034  | 0.15        | 0.016        | 0.0068       | 0.037       | 0.0098      | 0.056       | 0.00         | 0.00         | 0.00          |              |
| Analytical Precision (CV, %) <sup>c</sup>                                               |                   | 5.8                          | 12.0        | 3.4     | 2.8         | 6.4          | 4.7          | 13.6        | 15.3        | 9.2         | 16.3         | 12.0         | 8.7           |              |
| <b>Emerging PFAS Weekly-Averaged PM<sub>2.5</sub> Concentrations (pg/m<sup>3</sup>)</b> |                   |                              |             |         |             |              |              |             |             |             |              |              |               |              |
| Sample ID                                                                               | Sampling Duration | Air Volume (m <sup>3</sup> ) | PMPA        | PFO2HxA | NVHOS       | PEPA         | PFO3OA       | GenX        | PFO4DA      | PFO5DoA     | Nafion BP1   | Nafion BP2   | Nafion BP4    | Hydro Eve    |
| SP1_1                                                                                   | 091319-091919     | 1614                         | <b>1.19</b> | <0.029  | <b>7.02</b> | <0.037       | <b>0.042</b> | <0.040      | <0.016      | <0.011      | <b>0.13</b>  | <b>0.16</b>  | <b>0.0040</b> | <0.0062      |
| HV1_1                                                                                   | 092019-092619     | 2180                         | <b>0.95</b> | <0.021  | <b>0.76</b> | <0.028       | <0.016       | <0.029      | <0.012      | <0.008      | <b>0.016</b> | <b>0.031</b> | <0.0055       | <0.0046      |
| SW1                                                                                     | 092719-100319     | 1955                         | <b>0.96</b> | <0.024  | <b>1.63</b> | <0.031       | <0.017       | <0.033      | <0.013      | <0.0092     | <b>0.573</b> | <b>0.047</b> | <b>0.012</b>  | <0.0051      |
| SW2                                                                                     | 100419-101019     | 1922                         | <b>1.36</b> | <0.024  | <b>2.35</b> | <0.031       | <0.018       | <0.033      | <0.014      | <b>0.17</b> | <b>0.081</b> | <b>0.043</b> | <b>0.0085</b> | <b>0.070</b> |
| SW3                                                                                     | 101119-101719     | 1922                         | <b>1.20</b> | <0.024  | <b>0.85</b> | <0.031       | <0.018       | <0.033      | <0.014      | <0.0094     | <b>0.10</b>  | <b>0.063</b> | <0.0062       | <0.0052      |
| SW4                                                                                     | 101819-102419     | 1901                         | <b>1.27</b> | <0.024  | <b>2.59</b> | <0.032       | <b>0.088</b> | <0.034      | <0.014      | <0.0095     | <b>0.047</b> | <b>0.042</b> | 0.0029        | <0.0053      |
| SW5                                                                                     | 102519-103119     | 1923                         | <b>1.13</b> | <0.024  | <b>2.13</b> | <0.031       | <0.018       | <0.033      | <0.014      | <0.0094     | <b>0.064</b> | <b>0.068</b> | <b>0.0040</b> | <0.0052      |
| SW6                                                                                     | 110119-110719     | 1861                         | <b>1.42</b> | <0.025  | <b>0.36</b> | <0.032       | <0.018       | <0.034      | <0.014      | <0.0097     | <b>0.27</b>  | <b>0.044</b> | 0.0023        | <0.0054      |
| SW7                                                                                     | 110819-111419     | 1820                         | <b>1.51</b> | <0.025  | <0.023      | <b>0.104</b> | <0.019       | <0.035      | <b>0.45</b> | <b>4.16</b> | <b>0.033</b> | <b>0.035</b> | <b>0.0065</b> | <b>0.097</b> |
| SW8                                                                                     | 111519-112119     | 1850                         | <b>1.28</b> | <0.025  | <0.023      | 0.004        | <0.018       | <0.035      | <0.014      | <b>0.49</b> | <b>0.061</b> | <b>0.029</b> | <b>0.0033</b> | <b>0.062</b> |
| SW9                                                                                     | 112219-112819     | 1872                         | <b>1.12</b> | <0.025  | <0.022      | <0.032       | <0.018       | <0.034      | <0.014      | <0.0096     | <b>0.021</b> | <b>0.031</b> | <0.0064       | <0.0053      |
| SW10                                                                                    | 112919-120519     | 1864                         | <b>1.42</b> | <0.025  | <0.023      | 0.026        | <0.018       | <0.034      | <0.014      | <b>0.20</b> | <b>0.054</b> | <b>0.027</b> | 0.0008        | <b>0.054</b> |
| SW11                                                                                    | 120619-121219     | 1838                         | <b>1.60</b> | <0.025  | <0.023      | <b>0.138</b> | <0.019       | <0.035      | <0.014      | <b>0.32</b> | <b>0.068</b> | <b>0.050</b> | <b>0.012</b>  | <b>0.058</b> |
| SW12                                                                                    | 121319-121919     | 1856                         | <b>1.69</b> | <0.025  | <0.023      | 0.039        | <0.018       | <0.035      | <0.014      | <b>0.69</b> | <b>0.13</b>  | <b>0.055</b> | <b>0.029</b>  | <b>0.055</b> |
| SW13                                                                                    | 122019-122619     | 1828                         | <b>1.43</b> | <0.025  | <0.023      | 0.020        | <0.019       | <b>0.33</b> | <0.014      | <b>0.08</b> | <b>0.038</b> | <b>0.043</b> | <b>0.0040</b> | <b>0.058</b> |
| SW14                                                                                    | 122719-010220     | 1818                         | <b>1.85</b> | <0.025  | <0.023      | 0.016        | <b>0.030</b> | <0.035      | <0.014      | <0.0099     | <b>0.059</b> | <b>0.045</b> | <b>0.0091</b> | <b>0.068</b> |
| SW15                                                                                    | 010320-010920     | 1725                         | <0.0046     | <0.027  | <0.024      | <0.035       | <b>0.322</b> | <b>1.02</b> | <b>0.43</b> | <b>1.32</b> | <b>0.13</b>  | <b>0.034</b> | <b>0.019</b>  | <b>0.081</b> |
| SW16                                                                                    | 011020-011620     | 1799                         | <b>1.91</b> | <0.026  | <0.023      | 0.014        | <0.019       | 0.02        | <0.015      | <b>0.21</b> | <b>0.017</b> | <b>0.040</b> | 0.0024        | <b>0.074</b> |
| SW17                                                                                    | 011720-012320     | 1818                         | <b>1.98</b> | <0.025  | <0.023      | 0.050        | <0.019       | <b>3.20</b> | <b>0.58</b> | <b>3.13</b> | <b>0.071</b> | <b>0.034</b> | <b>0.0046</b> | <b>0.069</b> |

|                                                                     |               |      |             |              |             |        |              |              |               |             |               |              |               |              |
|---------------------------------------------------------------------|---------------|------|-------------|--------------|-------------|--------|--------------|--------------|---------------|-------------|---------------|--------------|---------------|--------------|
| SW18                                                                | 012420-013020 | 1810 | <b>1.85</b> | <0.025       | <0.023      | <0.033 | <0.019       | <0.035       | <b>0.0081</b> | <b>2.83</b> | <b>0.062</b>  | <b>0.045</b> | <b>0.017</b>  | <b>0.056</b> |
| SW21                                                                | 021420-022020 | 1708 | <b>2.02</b> | <0.027       | <0.025      | 0.0058 | <0.020       | <0.038       | <b>0.16</b>   | <b>3.20</b> | <b>0.38</b>   | <b>0.13</b>  | <b>0.026</b>  | <b>0.073</b> |
| SW22                                                                | 022120-022720 | 1729 | <b>1.76</b> | <0.027       | <0.024      | 0.0032 | <0.020       | <0.037       | <0.015        | <0.010      | <b>0.025</b>  | <b>0.049</b> | 0.0017        | <0.0058      |
| SW23                                                                | 022820-030520 | 1628 | <b>1.93</b> | <0.028       | <0.026      | <0.037 | <b>0.032</b> | <0.039       | <0.016        | <0.011      | <b>0.015</b>  | <b>0.050</b> | 0.0013        | <b>0.066</b> |
| SW24                                                                | 030620-031220 | 1653 | <b>1.76</b> | <0.028       | <0.025      | <0.036 | <0.021       | <0.039       | <0.016        | <b>0.10</b> | <b>0.030</b>  | <b>0.072</b> | <0.0073       | <b>0.070</b> |
| SW25                                                                | 031320-031920 | 1672 | <b>1.74</b> | <0.028       | <0.025      | 0.0032 | <0.020       | <0.038       | <0.016        | <0.011      | <b>0.053</b>  | <b>0.049</b> | <b>0.010</b>  | <b>0.065</b> |
| SW26                                                                | 032020-032620 | 1672 | <b>1.60</b> | <0.028       | <0.025      | <0.036 | <0.020       | <0.038       | <0.016        | <b>0.25</b> | <b>0.20</b>   | <b>0.039</b> | <b>0.0040</b> | <b>0.059</b> |
| NE1                                                                 | 092719-100319 | 1902 | <b>0.93</b> | <0.024       | <b>1.51</b> | <0.032 | <0.018       | <0.034       | <0.014        | <0.0095     | <b>0.039</b>  | <b>0.030</b> | <b>0.011</b>  | <0.0053      |
| NE2                                                                 | 100419-101019 | 1914 | <b>1.25</b> | <0.024       | <b>2.34</b> | <0.031 | <0.018       | <0.033       | <0.014        | <b>0.14</b> | <b>0.019</b>  | <b>0.026</b> | <0.0063       | <0.0052      |
| NE3                                                                 | 101119-101719 | 2089 | <b>1.09</b> | <0.022       | <b>1.04</b> | <0.029 | <b>0.037</b> | <0.031       | <0.012        | <0.0086     | <b>0.11</b>   | <b>0.053</b> | 0.0008        | <b>0.064</b> |
| NE4                                                                 | 101819-102419 | 2073 | <b>1.15</b> | <0.022       | <b>1.82</b> | <0.029 | <b>0.049</b> | <b>0.23</b>  | <0.013        | <0.0087     | <b>0.086</b>  | <b>0.032</b> | 0.0028        | <0.0048      |
| NE5                                                                 | 102519-103119 | 2114 | <b>1.08</b> | <0.022       | <b>2.07</b> | <0.028 | <0.016       | <0.030       | <0.012        | <0.0085     | <b>0.10</b>   | <b>0.035</b> | <0.0057       | <0.0047      |
| NE6                                                                 | 110119-110719 | 1983 | <0.0040     | <b>0.034</b> | <b>1.83</b> | <0.030 | <0.017       | <0.032       | <0.013        | <0.0091     | <0.0050       | <0.0050      | <0.0061       | <0.0050      |
| NE7                                                                 | 110819-111419 | 1949 | <0.0041     | <b>0.137</b> | <0.022      | <0.031 | <0.017       | <0.033       | <0.013        | <b>3.41</b> | <b>0.14</b>   | <b>0.018</b> | <b>0.010</b>  | 0.024        |
| NE8                                                                 | 111519-112119 | 2137 | <0.0037     | <b>0.21</b>  | <0.020      | <0.028 | <0.016       | <0.030       | <0.012        | <b>0.35</b> | <b>0.62</b>   | <b>0.030</b> | <b>0.016</b>  | 0.015        |
| NE9                                                                 | 112219-112819 | 2050 | <0.0039     | <b>0.08</b>  | <0.021      | <0.029 | <0.017       | <0.03        | <0.013        | <b>0.38</b> | <b>1.88</b>   | <b>0.070</b> | <b>0.033</b>  | <0.0049      |
| NE10                                                                | 112919-120519 | 1863 | <0.0043     | <b>0.099</b> | <0.023      | <0.032 | <0.018       | <b>0.23</b>  | <0.014        | <b>0.43</b> | <b>0.22</b>   | <b>0.017</b> | <b>0.034</b>  | 0.023        |
| NE11                                                                | 120619-121219 | 1839 | <0.0044     | <b>0.059</b> | <0.023      | <0.033 | <0.019       | <b>0.37</b>  | <0.014        | <b>0.55</b> | <b>0.24</b>   | <b>0.015</b> | <b>0.029</b>  | 0.025        |
| NE12                                                                | 121319-121919 | 1841 | <0.0043     | <0.025       | <0.023      | <0.033 | <0.019       | <0.035       | <0.014        | <0.0098     | <b>0.0079</b> | 0.008        | <0.0065       | <0.0054      |
| NE13                                                                | 122019-122619 | 1828 | <0.0044     | <0.025       | <0.023      | <0.033 | <0.019       | <b>0.26</b>  | <0.014        | <b>0.31</b> | <b>0.25</b>   | <b>0.055</b> | <b>0.040</b>  | 0.020        |
| NE15                                                                | 010320-010920 | 1788 | <0.0045     | <0.026       | <0.024      | <0.034 | <0.019       | <0.036       | <0.015        | <b>0.34</b> | <b>0.063</b>  | <b>0.023</b> | <b>0.0089</b> | 0.022        |
| NE18                                                                | 021420-022020 | 1858 | <0.0043     | <0.025       | <0.023      | <0.032 | <0.018       | <0.034       | <0.014        | <b>0.11</b> | <b>0.10</b>   | <b>0.050</b> | <b>0.032</b>  | <0.0054      |
| NE19                                                                | 022120-022720 | 1720 | <0.0047     | <0.027       | <0.024      | <0.035 | <0.020       | <b>0.42</b>  | <0.015        | <b>0.29</b> | <b>0.36</b>   | <b>0.24</b>  | <b>0.093</b>  | 0.021        |
| NE20                                                                | 022820-030520 | 1652 | <0.0048     | <0.028       | <0.025      | <0.036 | <0.021       | <b>0.45</b>  | <0.016        | <b>1.20</b> | <b>0.20</b>   | <b>0.029</b> | <b>0.012</b>  | 0.029        |
| NE21                                                                | 030620-031220 | 1644 | <0.0049     | <0.028       | <0.026      | <0.037 | <0.021       | <b>0.14</b>  | <0.016        | <b>0.50</b> | <b>0.10</b>   | <b>0.033</b> | <b>0.16</b>   | 0.020        |
| NE22                                                                | 031320-031920 | 1662 | <0.0048     | <0.028       | <0.025      | <0.036 | <0.021       | <b>0.096</b> | <0.016        | <b>0.27</b> | <b>0.02</b>   | <b>0.026</b> | <b>0.0036</b> | <0.0060      |
| NE23                                                                | 032020-032620 | 1613 | <0.0050     | <0.029       | <0.026      | <0.037 | <0.021       | <b>0.091</b> | <0.016        | <b>0.20</b> | <b>0.11</b>   | <0.0062      | <b>0.0072</b> | <0.0062      |
| Field Measurement Detection Limit (pg/m <sup>3</sup> ) <sup>b</sup> |               |      | 0.0021      | 0.012        | 0.046       | 0.083  | 0.0089       | 0.059        | 0.0068        | 0.0047      | 0.0026        | 0.013        | 0.0032        | 0.034        |
| Average Field Blank (pg/m <sup>3</sup> )                            |               |      | 0.00        | 0.00         | 0.019       | 0.0079 | 0.00         | 0.0080       | 0.00          | 0.00        | 0.00          | 0.003        | 0.00          | 0.0032       |
| Analytical Precision (CV, %) <sup>c</sup>                           |               |      | 7.5         | 0.2          | 6.2         | 16.3   | 12.9         | 15.4         | 7.7           | 30.9        | 3.6           | 3.6          | 3.8           | 12.2         |

32 <sup>a</sup>: Reported concentrations were blank corrected.

33 <sup>b</sup>: 3σ of the field blank divided by a sample air volume of 1901 m<sup>3</sup> (i.e., sampling flow rate of 220 L min<sup>-1</sup>, sampling duration of 6 days).

34 <sup>c</sup>: Pooled coefficient of variation: pooled standard deviation divided by the mean value of duplicate sample analyses. For paired data,  $\sigma_{\text{pooled}} = [\sum di^2/2n]^{1/2}$ , where:  
35  $\sigma_{\text{pooled}}$  is the standard deviation, d is the difference between paired i values, and n is the number of pairs.  
36  
37

38 **Table S4.** Descriptive statistics of PFAS PM<sub>2.5</sub> measurements at the SW and NE sites

39 (DF: Detection Frequency).

|                  |            | SW (N=26) |                          |                          | NE (N=20) |                          |                          |
|------------------|------------|-----------|--------------------------|--------------------------|-----------|--------------------------|--------------------------|
| Compound Name    |            | DF (%)    | Min (pg/m <sup>3</sup> ) | Max (pg/m <sup>3</sup> ) | DF (%)    | Min (pg/m <sup>3</sup> ) | Max (pg/m <sup>3</sup> ) |
| Legacy<br>PFAS   | PFBA       | 84.6      | 0.16                     | 0.96                     | 75.0      | 0.084                    | 0.75                     |
|                  | PFHxA      | 88.5      | 0.0054                   | 6.1                      | 25.0      | 0.0047                   | 5.0                      |
|                  | PFHpA      | 0.0       | 0.0064                   | 0.0087                   | 5.0       | 0.0066                   | 0.71                     |
|                  | PFNA       | 0.0       | 0.0046                   | 0.0062                   | 5.0       | 0.0047                   | 0.24                     |
|                  | PFDoA      | 3.8       | 0.0055                   | 0.29                     | 0.0       | 0.0026                   | 0.047                    |
|                  | PFHxDA     | 23.1      | 0.021                    | 1.9                      | 10.0      | 0.022                    | 5.3                      |
|                  | PFODA      | 0.0       | 0.018                    | 0.025                    | 15.0      | 0.019                    | 2.8                      |
|                  | PFHxS      | 3.8       | 0.024                    | 0.73                     | 15.0      | 0.024                    | 0.22                     |
|                  | PFOS       | 96.2      | 0.0051                   | 3.2                      | 95.0      | 0.0053                   | 4.7                      |
|                  | PFDoS      | 7.7       | 0.050                    | 1.4                      | 5.0       | 0.051                    | 3.6                      |
| Emerging<br>PFAS | PMPA       | 96.2      | 0.0046                   | 2.0                      | 25.0      | 0.0037                   | 1.2                      |
|                  | PFO2HxA    | 0.0       | 0.021                    | 0.029                    | 30.0      | 0.022                    | 0.21                     |
|                  | NVHOS      | 30.8      | 0.022                    | 7.0                      | 30.0      | 0.020                    | 2.3                      |
|                  | PEPA       | 7.7       | 0.0032                   | 0.14                     | 0.0       | 0.028                    | 0.037                    |
|                  | PFO3OA     | 19.2      | 0.016                    | 0.32                     | 10.0      | 0.016                    | 0.049                    |
|                  | GenX       | 11.5      | 0.017                    | 3.2                      | 45.0      | 0.030                    | 0.45                     |
|                  | PFO4DA     | 19.2      | 0.0081                   | 0.58                     | 0.0       | 0.012                    | 0.016                    |
|                  | PFO5DoA    | 53.8      | 0.0083                   | 4.2                      | 70.0      | 0.0085                   | 3.4                      |
|                  | Nafion BP1 | 100.0     | 0.015                    | 0.57                     | 95.0      | 0.0050                   | 1.9                      |
|                  | Nafion BP2 | 100.0     | 0.027                    | 0.16                     | 85.0      | 0.0050                   | 0.24                     |
|                  | Nafion BP4 | 61.5      | 0.0008                   | 0.029                    | 70.0      | 0.0008                   | 0.16                     |
| Hydro Eve        | 65.4       | 0.0046    | 0.097                    | 5.0                      | 0.0047    | 0.064                    |                          |

40

41

42

43

44

45

46

47

48

49

50 **Table S5.** Spearman correlation analysis for paired SW and NE site measurements.

| Compound Name                |            | Spearman Correlation, two-tailed, $\alpha=0.01$ |               |
|------------------------------|------------|-------------------------------------------------|---------------|
|                              |            | SW vs. NE                                       |               |
|                              |            | Correlation Coefficient                         | P-value       |
| Legacy<br>PFAS               | PFBA       | <b>0.618</b>                                    | <b>0.004*</b> |
|                              | PFHxA      | 0.289                                           | 0.217         |
|                              | PFHpA      | N/A                                             | N/A           |
|                              | PFNA       | N/A                                             | N/A           |
|                              | PFDoA      | N/A                                             | N/A           |
|                              | PFHxDA     | -0.165                                          | 0.487         |
|                              | PFODA      | N/A                                             | N/A           |
|                              | PFHxS      | N/A                                             | N/A           |
|                              | PFOS       | <b>0.600</b>                                    | <b>0.005*</b> |
|                              | PFDoS      | -0.053                                          | 0.826         |
| Emerging<br>PFAS             | PMPA       | <b>-0.516</b>                                   | <b>0.020*</b> |
|                              | PFO2HxA    | N/A                                             | N/A           |
|                              | NVHOS      | <b>0.975</b>                                    | <b>0.000*</b> |
|                              | PEPA       | N/A                                             | N/A           |
|                              | PFO3OA     | 0.348                                           | 0.132         |
|                              | GenX       | 0.046                                           | 0.848         |
|                              | PFO4DA     | N/A                                             | N/A           |
|                              | PFO5DoA    | 0.344                                           | 0.138         |
|                              | Nafion BP1 | <b>-0.595</b>                                   | <b>0.006*</b> |
|                              | Nafion BP2 | 0.229                                           | 0.332         |
|                              | Nafion BP4 | -0.313                                          | 0.178         |
| Hydro Eve                    | 0.215      | 0.362                                           |               |
| Total Legacy PFAS            |            | <b>0.487</b>                                    | <b>0.029*</b> |
| Total Emerging PFAS          |            | 0.277                                           | 0.238         |
| Total PFAS (legacy+emerging) |            | <b>0.483</b>                                    | <b>0.031*</b> |

51 \*: statistically significant at  $\alpha= 0.01$  for Spearman Correlation Test.



52 **Table S6.** Spearman correlation coefficients among PFAS species with detection frequency >20%.

|            | PFBA           | PFHxA          | PFOS           | PMPA          | NVHOS          | GenX          | Hydro Eve     | Nafion BP4    | Nafion BP1    | PFO5DoA | Nafion BP2 |
|------------|----------------|----------------|----------------|---------------|----------------|---------------|---------------|---------------|---------------|---------|------------|
| PFBA       | 1              |                |                |               |                |               |               |               |               |         |            |
| PFHxA      | <b>-.406**</b> | 1              |                |               |                |               |               |               |               |         |            |
| PFOS       | 0.156          | <b>-.516**</b> | 1              |               |                |               |               |               |               |         |            |
| PMPA       | 0.235          | <b>.597**</b>  | <b>-.388**</b> | 1             |                |               |               |               |               |         |            |
| NVHOS      | <b>-.748**</b> | <b>.437**</b>  | <b>-.339*</b>  | -0.031        | 1              |               |               |               |               |         |            |
| GenX       | <b>.320*</b>   | <b>-.465**</b> | 0.212          | <b>-.357*</b> | -0.284         | 1             |               |               |               |         |            |
| Hydro Eve  | <b>.558**</b>  | 0.067          | -0.083         | <b>.504**</b> | <b>-.448**</b> | 0.101         | 1             |               |               |         |            |
| Nafion BP4 | <b>.357*</b>   | <b>-.479**</b> | 0.119          | <b>-.337*</b> | <b>-.418**</b> | <b>.391**</b> | 0.198         | 1             |               |         |            |
| Nafion BP1 | 0.045          | -0.24          | 0.006          | <b>-.313*</b> | -0.081         | 0.285         | 0.004         | <b>.652**</b> | 1             |         |            |
| PFO5DoA    | <b>.631**</b>  | <b>-.537**</b> | 0.059          | -0.087        | <b>-.594**</b> | <b>.379**</b> | <b>.502**</b> | <b>.623**</b> | <b>.392**</b> | 1       |            |
| Nafion BP2 | -0.006         | <b>.353*</b>   | -0.051         | <b>.442**</b> | 0.085          | -0.21         | 0.176         | 0.145         | 0.247         | -0.157  | 1          |

53 \*\* significant at  $\alpha=0.01$ (two-tailed), \* significant at  $\alpha= 0.05$  (two-tailed).

54

55

56

57

58

59

60

61

62 **Table S7.** Paired upwind and downwind sampling dates.

63

| Sampling Started | 10/4/2019 | 11/1/2019 | 11/8/2019 | 11/15/2019 | 12/6/2019 | 12/20/2019 | 2/14/2020 | 2/21/2020 | 2/28/2020 | 3/6/2020 |
|------------------|-----------|-----------|-----------|------------|-----------|------------|-----------|-----------|-----------|----------|
| Wind Direction   | NE        | NE        | NE        | NE         | NE        | NE         | NE        | SW        | SW        | SW       |
| Downwind Site    | SW        | SW        | SW        | SW         | SW        | SW         | SW        | NE        | NE        | NE       |

64

65

66

67

68

69

70

71

72

73

74

75

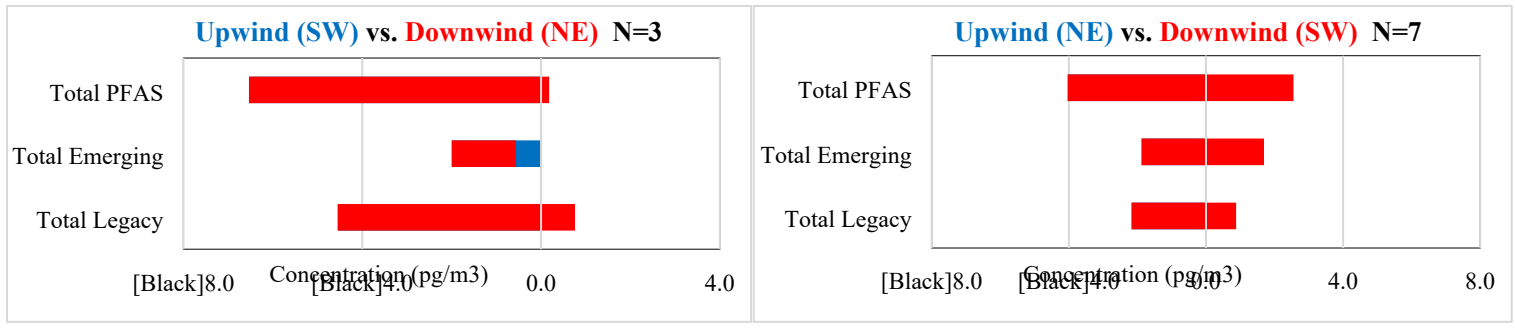

76  
77  
78  
79  
80  
81

**Figure S1.** Upwind and downwind PFAS PM<sub>2.5</sub> concentrations.

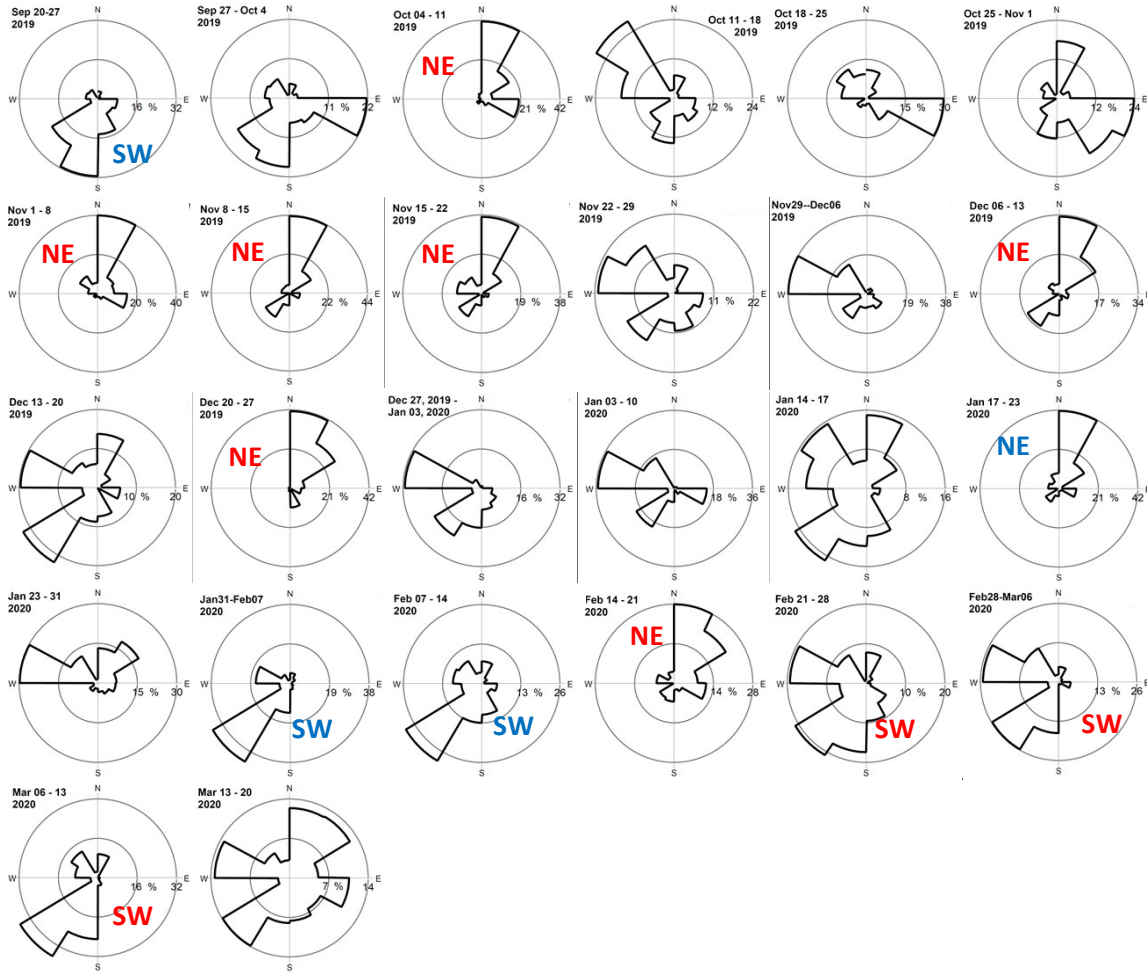

Red: Paired NE and SW PFAS Measurement

82 Blue: Only SW PFAS Measurement

83

84 **Figure S2.** Weekly wind roses for the SW and NE sites.

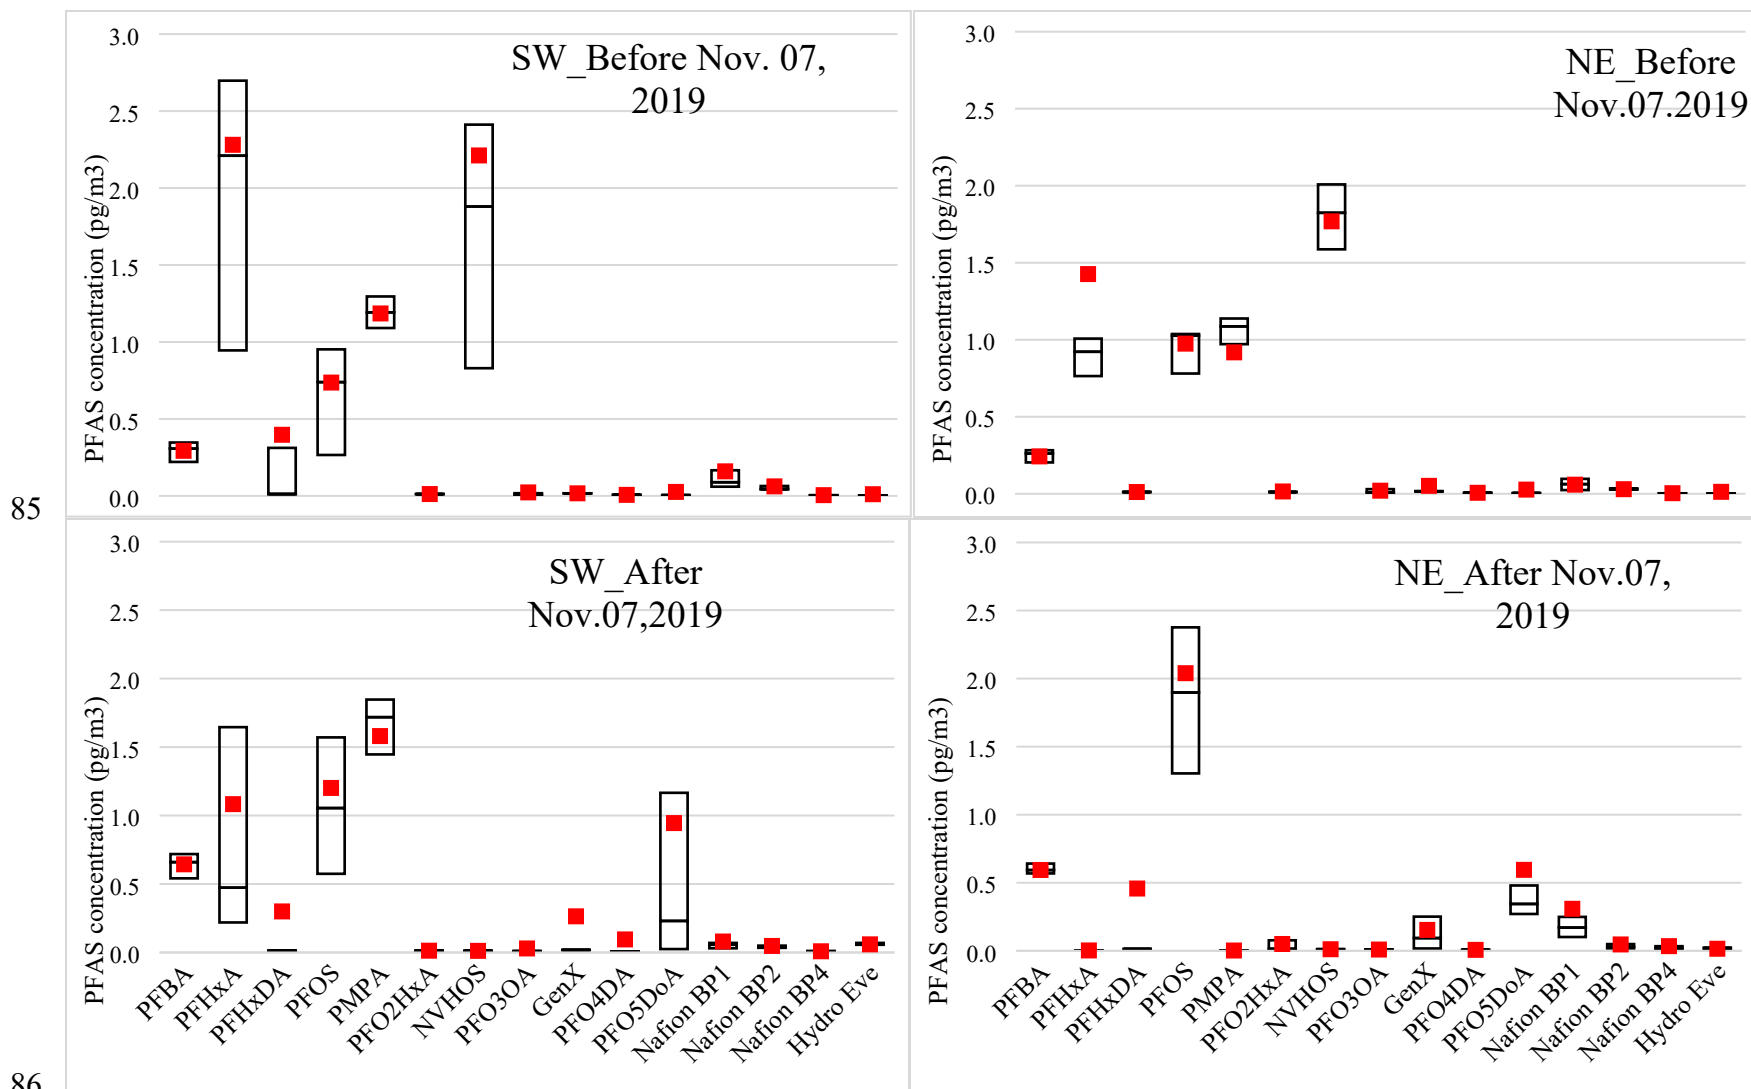

87 **Figure S3.** Box-plot of weekly-averaged PFAS species concentrations in  $PM_{2.5}$  ( $pg/m^3$ ) for all PFAS species with detection  
 88 frequencies >10%, measured at SW and NE sites, before and after November 07, 2019. The top, central, and bottom of each box  
 89 represent the third quartile, median, and the first quartile, respectively. Red squares represent the mean value.

90 **Potential Sources of Individual PFAS.** For four decades, the Chemours' Fayetteville Works has released thousands of pounds of GenX  
91 and other PFAS annually to the environment.<sup>1</sup> According to emissions data submitted by the Chemours' Fayetteville Works facility to  
92 NC DEQ,<sup>2,3</sup> PFAS emissions to air averaged 45,390 kg/year during 2012-2016, and the total PFAS emissions at the Fayetteville Works  
93 facility were 109,393 kg/year in 2017. It is noteworthy that several control actions were taken by the Chemours' Fayetteville Works  
94 facility to reduce PFAS emissions as required by NC DEQ since 2018.<sup>4</sup> For example, carbon adsorber units were commissioned and  
95 scrubbers were upgraded in order to meet the requirements of the consent order. A thermal oxidizer/4-stage scrubber system designed  
96 for 99.99% PFAS removal was installed and was fully operational December 27, 2019.<sup>5</sup> Two removal efficiency tests (one in February,  
97 2020, and the other one in January, 2021) were performed by Chemours since the installation of the thermal oxidizer.<sup>6, 7</sup> These tests  
98 concluded that the thermal oxidizer reached the >99.99% removal requirement based on measurement of five target PFAS compounds:  
99 HFPO monomer, GenX, HFPO-DAF (hexafluoropropylene dimer acid fluoride), COF<sub>2</sub> (carbonyl difluoride), and Fluoroether E-1  
100 (heptafluoropropyl-1,2,2,2-tetrafluoroethyl ether). Below we provide some information of potential sources about selected PFAS  
101 compounds we detected.

102 **PFBA and PFHxA:** PFBA and PFHxA are sometimes used as substitutes for longer-chain PFAS (e.g., PFOA).<sup>8, 9, 10</sup> PFBA was  
103 frequently detected at both sites (85% at SW site and 75% at NE site). Similarly, PFHxA was frequently detected at the SW site (88%).  
104 PFBA and PFHxA are both positively correlated with several longer-chain PFAS in this study (Table S6), suggesting they are used  
105 (precursor) or generated (product or byproduct) in the manufacturing process.

106 **PFOA:** the ammonium salts of PFOA are mainly used in the production of fluoropolymers and can readily dissociate into PFOA  
107 in the environment. Therefore, direct industrial emissions are a source of PFOA.<sup>11, 12</sup> PFOA has been measured and identified as the  
108 predominant PFAS species near fluorochemical facilities in the US before 2015,<sup>13</sup> or in other countries (e.g. Italy, Spain, Japan, and  
109 China)<sup>14-19</sup> where there are still ongoing PFOA production to meet market demands without regulations on PFOA emissions.<sup>20</sup> Continued  
110 occurrence of PFOA contamination in surface water has been seen tens of kilometers away from manufacturing plants at least 10 years  
111 after dramatic reductions in air emissions,<sup>21, 22</sup> suggesting long-term impacts of legacy contamination, manufacturing byproducts or  
112 secondary formation in the local environment. Eight of the main fluoropolymer manufacturers in the U.S. participated in the U.S.  
113 Environmental Protection Agency (EPA) 2010/2015 Stewardship Program in 2006<sup>8</sup> to completely cease the production and use of PFOA  
114 and related compounds by 2015.<sup>23</sup> At the Chemours' Fayetteville Works facility, PFOA was produced during 2002 to 2013, and was  
115 gradually phased out while using GenX as a replacement.<sup>24</sup> Reported emission data from the Chemours Company-Fayetteville Works  
116 facility and measurement of process/non-process wastewater measured inside the facility are consistent with the phase out of PFOA  
117 production at Chemours.<sup>25, 26</sup> PFOA was below detection limits in PM<sub>2.5</sub> samples in our study.

118 **PFOS:** Unlike PFOA, which has been discharged primarily from point sources at manufacturing facilities, PFOS has more  
119 widely dispersed emission sources.<sup>11</sup> Though PFOS and PFOA were phased out of production in the US in the 2000s, PFOS was still  
120 detected at higher concentrations in the nearfield samples in our study than in regional background samples, suggesting either that PFOS  
121 is emitted as a chemical impurity during manufacturing, emitted from previously contaminated land through volatilization or re-  
122 entrainment of contaminated soil, or formed from other PFAS through atmospheric/environmental chemistry. A PFAS emission

123 inventory provided by the Fayetteville Works facility for 2012-2016 reported no detectable PFOS emitted and the emissions of some  
124 potential PFOS precursors (e.g., sulfonamide substances) were low. Higher PM<sub>2.5</sub> concentrations of PFOS than PFOA measured during  
125 our study are consistent with recent studies around this same area that analyzed drinking and surface water levels of PFOS and PFOA.  
126 These recent studies found that PFOS water concentrations were higher than PFOA.<sup>27, 28</sup> PFOS was the only C8 legacy PFAS measured  
127 in ambient PM<sub>2.5</sub> samples collected in this area.

128         **GenX:** the ammonium salt of HFPO-DA, “GenX”, has been used as a substitute for PFOA since 2013, but emissions have been  
129 recently reduced through regulatory controls.<sup>29</sup> Its release as an airborne contaminant has been previously verified.<sup>29</sup> GenX was first  
130 detected in the Cape Fear River in 2012,<sup>30</sup> and Chemours Company-Fayetteville Works facility acknowledged that GenX produced as a  
131 byproduct was released into the Cape Fear River through the Fayetteville Works wastewater treatment plant starting in 1980. High levels  
132 of GenX have been measured in local drinking water wells and in groundwater samples collected from both upstream and downstream  
133 of the Chemours’ Fayetteville Works.<sup>28, 31, 32</sup> This suggests that GenX was emitted into the air and delivered to these waters by  
134 atmospheric wet or dry deposition.<sup>2, 31, 33</sup> Similarly, Brandsma et al.<sup>34</sup> detected GenX in plant material collected 3 km downwind from a  
135 fluoropolymer manufacturing facility in the Netherlands, indicating that GenX undergoes near-field atmospheric deposition. Due to the  
136 control technologies requested by NC DEQ in 2018 and 2019,<sup>4</sup> reported GenX emissions from the Chemours’ Fayetteville Works were  
137 reduced to 1.31 kg/year in 2019<sup>35</sup> and 0.75 kg/year in 2020,<sup>36</sup> while the value was 1044 kg/year in 2017.<sup>37</sup> The detection frequency for  
138 GenX in PM<sub>2.5</sub> samples analyzed during our study was relatively low, although the detection limits were not as low as some species. In  
139 our study, GenX was measured in 12 out of total 46 SW+NE samples near the Chemours’ Fayetteville Works facility, with PM<sub>2.5</sub>



140 concentrations mostly  $<0.5 \text{ pg/m}^3$ , with the exception of two spikes in January 2020 with concentrations  $>1 \text{ pg/m}^3$ . However, it should  
141 be stated here we did not measure the gas-phase GenX levels during this study.

142 **NVHOS:** NVHOS was measured in moderately high concentrations in September and October 2019 at both near-field sampling  
143 sites ( $0.02$  to  $7.0 \text{ pg/m}^3$ ) and below detection limits after those two months, suggesting either the success of control efforts to remove it  
144 or a change in manufacturing activities in early November.

145 **Nafion BP1, Nafion BP2 and Nafion BP4:** These compounds were detectable in almost all the  $\text{PM}_{2.5}$  samples collected at both  
146 near-field sites. Since one main group of the manufacturing products at the Chemours' Fayetteville Works are Nafion membranes and  
147 films, it is not surprising that we observed these Nafion byproducts frequently in  $\text{PM}_{2.5}$ . Notably, these same three Nafion byproducts  
148 have been recently measured in pine needles collected within 2 miles of this facility,<sup>38</sup> indicating the existence and contamination of  
149 these three byproducts in the surrounding area of the facility.

150 **PMPA:** PMPA was detected in 96% of all the  $\text{PM}_{2.5}$  samples collected at the SW near-field sampling site. PMPA and Nafion  
151 byproducts (1, 2, and 4) have also been detected in high concentrations in process and non-process wastewater collected from the facility,  
152 suggesting PMPA originates from the Chemours Fayetteville Works facility.<sup>25, 39</sup>

153

154

155

156

157 **References:**

- 158 1. NC Health News. Wells polluted with PFAS found 18 miles from Chemours chemical plant. **2021**.
- 159 2. D'Ambro, E. L.; Pye, H. O.; Bash, J. O.; Bowyer, J.; Allen, C.; Efstathiou, C.; Gilliam, R. C.; Reynolds, L.; Talgo, K.; Murphy,  
160 B. N., Characterizing the Air Emissions, Transport, and Deposition of Per-and Polyfluoroalkyl Substances from a Fluoropolymer  
161 Manufacturing Facility. *Environmental Science & Technology* **2021**, *55*, (2), 862-870.
- 162 3. NC Department of Environmental Quality. GenX Investigation. **2018**.
- 163 4. NC Department of Environmental Quality. Chemours Consent Order. [https://deq.nc.gov/news/key-issues/genx-](https://deq.nc.gov/news/key-issues/genx-investigation/chemours-consent-order#consent-order-2019)  
164 [investigation/chemours-consent-order#consent-order-2019](https://deq.nc.gov/news/key-issues/genx-investigation/chemours-consent-order#consent-order-2019). **2019**.
- 165 5. Chemours, Chemours' Fayetteville Workes Site Starts Up Thermal Oxidizer Ahead of Schedule. **2019**.
- 166 6. NC Department of Environmental Quality. 2020-105ST C3 Dimer/PFAS Thermal Oxidizer Test Report. **2020**.
- 167 7. NC Department of Environmental Quality. 2021-039ST C3 Dimer/PFAS Thermal Oxidizer Test Report. **2021**.
- 168 8. United States Environmental Protection Agency. PFOA Stewardship Program. Homepage (2010) [http://www.epa.](http://www.epa.gov/oppt/pfoa/pubs/stewardship)  
169 [gov/oppt/pfoa/pubs/stewardship](http://www.epa.gov/oppt/pfoa/pubs/stewardship). **2015**.
- 170 9. Liu, X.; Guo, Z.; Krebs, K. A.; Pope, R. H.; Roache, N. F., Concentrations and trends of perfluorinated chemicals in potential  
171 indoor sources from 2007 through 2011 in the US. *Chemosphere* **2014**, *98*, 51-57.
- 172 10. D'Agostino, L. A.; Mabury, S. A., Aerobic biodegradation of 2 fluorotelomer sulfonamide-based aqueous film-forming foam  
173 components produces perfluoroalkyl carboxylates. *Environmental Toxicology and Chemistry* **2017**, *36*, (8), 2012-2021.
- 174 11. Pistocchi, A.; Loos, R., A map of European emissions and concentrations of PFOS and PFOA. *Environmental Science &*  
175 *Technology* **2009**, *43*, (24), 9237-9244.
- 176 12. Wang, P.; Lu, Y.; Wang, T.; Fu, Y.; Zhu, Z.; Liu, S.; Xie, S.; Xiao, Y.; Giesy, J. P., Occurrence and transport of 17 perfluoroalkyl  
177 acids in 12 coastal rivers in south Bohai coastal region of China with concentrated fluoropolymer facilities. *Environmental Pollution*  
178 **2014**, *190*, 115-122.
- 179 13. Barton, C. A.; Butler, L. E.; Zarzecki, C. J.; Flaherty, J.; Kaiser, M., Characterizing perfluorooctanoate in ambient air near the  
180 fence line of a manufacturing facility: comparing modeled and monitored values. *Journal of the Air & Waste Management Association*  
181 **2006**, *56*, (1), 48-55.
- 182 14. Sánchez-Avila, J.; Meyer, J.; Lacorte, S., Spatial distribution and sources of perfluorochemicals in the NW Mediterranean coastal  
183 waters (Catalonia, Spain). *Environmental Pollution* **2010**, *158*, (9), 2833-2840.
- 184 15. Loos, R.; Locoro, G.; Huber, T.; Wollgast, J.; Christoph, E. H.; De Jager, A.; Gawlik, B. M.; Hanke, G.; Umlauf, G.; Zaldívar, J.-  
185 M., Analysis of perfluorooctanoate (PFOA) and other perfluorinated compounds (PFCs) in the River Po watershed in N-Italy.  
186 *Chemosphere* **2008**, *71*, (2), 306-313.
- 187 16. Lein, N. P. H.; Fujii, S.; Tanaka, S.; Nozoe, M.; Tanaka, H., Contamination of perfluorooctane sulfonate (PFOS) and  
188 perfluorooctanoate (PFOA) in surface water of the Yodo River basin (Japan). *Desalination* **2008**, *226*, (1-3), 338-347.

- 189 17. Kim, J.-W.; Tue, N. M.; Isobe, T.; Misaki, K.; Takahashi, S.; Viet, P. H.; Tanabe, S., Contamination by perfluorinated compounds  
190 in water near waste recycling and disposal sites in Vietnam. *Environmental Monitoring and Assessment* **2013**, *185*, (4), 2909-2919.
- 191 18. Wang, T.; Lu, Y.; Chen, C.; Naile, J. E.; Khim, J. S.; Park, J.; Luo, W.; Jiao, W.; Hu, W.; Giesy, J. P., Perfluorinated compounds  
192 in estuarine and coastal areas of north Bohai Sea, China. *Marine Pollution Bulletin* **2011**, *62*, (8), 1905-1914.
- 193 19. Pan, Y.; Shi, Y.; Wang, J.; Jin, X.; Cai, Y., Pilot investigation of perfluorinated compounds in river water, sediment, soil and fish  
194 in Tianjin, China. *Bulletin of Environmental Contamination and Toxicology* **2011**, *87*, (2), 152-157.
- 195 20. Wang, P.; Wang, T.; Giesy, J. P.; Lu, Y., Perfluorinated compounds in soils from Liaodong Bay with concentrated fluorine  
196 industry parks in China. *Chemosphere* **2013**, *91*, (6), 751-757.
- 197 21. Small, M. In Final Report of the Peer Consultation Panel Conducting the Review for the Scientific Peer Consultation Process for  
198 a Site Environmental Assessment Program as part of the DuPont–EPA Memorandum of Understanding and Phase II Workplan.  
199 Pittsburgh, PA: Civil & Environmental Engineering and Engineering & Public Policy, Carnegie Mellon University (15 Jul 2009).  
200 Available: <http://itp-pfoa.ce>.
- 201 22. Paustenbach, D. J.; Panko, J. M.; Scott, P. K.; Unice, K. M., A methodology for estimating human exposure to perfluorooctanoic  
202 acid (PFOA): a retrospective exposure assessment of a community (1951–2003). *Journal of Toxicology and Environmental Health, Part*  
203 *A* **2006**, *70*, (1), 28-57.
- 204 23. Vierke, L.; Staude, C.; Biegel-Engler, A.; Drost, W.; Schulte, C., Perfluorooctanoic acid (PFOA)—main concerns and regulatory  
205 developments in Europe from an environmental point of view. *Environmental Sciences Europe* **2012**, *24*, (1), 1-11.
- 206 24. Pétré, M.-A.; Genreux, D. P.; Koropeczyk-Cox, L.; Knappe, D. R.; Dubosq, S.; Gilmore, T. E.; Hopkins, Z. R., Per-and  
207 Polyfluoroalkyl Substance (PFAS) Transport from Groundwater to Streams near a PFAS Manufacturing Facility in North Carolina,  
208 USA. *Environmental Science & Technology* **2021**, *55*, (9), 5848-5856.
- 209 25. Geosyntec Consultants of North Carolina, I., Characterization of PFAS in Process and Non-process Wastewater and Stormwater.  
210 May 28. **2021**.
- 211 26. NC Department of Environmental Quality: Division of Air Quality. Summary of Chemours Self-Reported PFAS Emissions,  
212 2012-2016. **2018**.
- 213 27. Hu, X. C.; Andrews, D. Q.; Lindstrom, A. B.; Bruton, T. A.; Schaidler, L. A.; Grandjean, P.; Lohmann, R.; Carignan, C. C.; Blum,  
214 A.; Balan, S. A., Detection of poly-and perfluoroalkyl substances (PFASs) in US drinking water linked to industrial sites, military fire  
215 training areas, and wastewater treatment plants. *Environmental Science & Technology Letters* **2016**, *3*, (10), 344-350.
- 216 28. Sun, M.; Arevalo, E.; Strynar, M.; Lindstrom, A.; Richardson, M.; Kearns, B.; Pickett, A.; Smith, C.; Knappe, D. R., Legacy and  
217 emerging perfluoroalkyl substances are important drinking water contaminants in the Cape Fear River Watershed of North Carolina.  
218 *Environmental Science & Technology Letters* **2016**, *3*, (12), 415-419.
- 219 29. Galloway, J. E.; Moreno, A. V.; Lindstrom, A. B.; Strynar, M. J.; Newton, S.; May, A. A.; Weavers, L. K., Evidence of air  
220 dispersion: HFPO–DA and PFOA in Ohio and West Virginia surface water and soil near a fluoropolymer production facility.  
221 *Environmental Science & Technology* **2020**, *54*, (12), 7175-7184.

- 222 30. Strynar, M.; Dagnino, S.; McMahan, R.; Liang, S.; Lindstrom, A.; Andersen, E.; McMillan, L.; Thurman, M.; Ferrer, I.; Ball,  
223 C., Identification of novel perfluoroalkyl ether carboxylic acids (PFECAs) and sulfonic acids (PFESAs) in natural waters using accurate  
224 mass time-of-flight mass spectrometry (TOFMS). *Environmental Science & Technology* **2015**, *49*, (19), 11622-11630.
- 225 31. Roostaei, J.; Colley, S.; Mulhern, R.; May, A. A.; Gibson, J. M., Predicting the risk of GenX contamination in private well water  
226 using a machine-learned Bayesian network model. *Journal of Hazardous Materials* **2021**, *411*, 125075.
- 227 32. Hopkins, Z. R.; Sun, M.; DeWitt, J. C.; Knappe, D. R., Recently detected drinking water contaminants: GenX and other per-and  
228 polyfluoroalkyl ether acids. *Journal-American Water Works Association* **2018**, *110*, (7), 13-28.
- 229 33. Shimizu, M. S.; Mott, R.; Potter, A.; Zhou, J.; Baumann, K.; Surratt, J. D.; Turpin, B.; Avery, G. B.; Harfmann, J.; Kieber, R. J.,  
230 Atmospheric deposition and annual flux of legacy perfluoroalkyl substances and replacement perfluoroalkyl ether carboxylic acids in  
231 Wilmington, NC, USA. *Environmental Science & Technology Letters* **2021**, *8*, (5), 366-372.
- 232 34. Brandsma, S.; Koekkoek, J.; van Velzen, M.; de Boer, J., The PFOA substitute GenX detected in the environment near a  
233 fluoropolymer manufacturing plant in the Netherlands. *Chemosphere* **2019**, *220*, 493-500.
- 234 35. Chemours Company-Fayetteville Works 2019 Air Emissions Inventory Report. Submitted to NC DEQ-Division of Air Quality  
235 on June 25, 2020. **2020**.
- 236 36. Chemours Company-Fayetteville Works 2020 Air Emissions Inventory Report. Submitted to NC DEQ-Division of Air Quality  
237 on June 17, 2021. **2021**.
- 238 37. Chemours Company. December Monthly Emissions Report Pursuant to Paragraph 8. 2019. <https://www.chemours.com/En/-/Media/Files/Corporate/Fayetteville-Works/8d-Ncdeq-MonthlyEmissions-Report-12202019.Pdf>. **December 20, 2019**.
- 239 38. Kirkwood, K. I.; Fleming, J.; Nguyen, H.; Reif, D. M.; Baker, E. S.; Belcher, S. M., Utilizing Pine Needles to Temporally and  
240 Spatially Profile Per-and Polyfluoroalkyl Substances (PFAS). *Environmental Science & Technology* **2022**, *56*, (6), 3441-3451.
- 242 39. Geosyntec Consultants of North Carolina, I., Characterization of PFAS in Process and Non-process Wastewater and Stormwater.  
243 Quarterly Report #1. July 31. **2019**.

244

245
